# Supplementary material
Source: PubMed Central journal article supplement (PMC5331827)
Supplement: JVI.02096-16_zjv999182412s1.pdf [file JVI.02096-16_zjv999182412s1.pdf]

# Supplemental Material

## Domain Organization and Evolution of the Highly Divergent 5' Coding Region of Genomes of Arteriviruses, Including the Novel Possum Nidovirus

Anastasia Gulyaeva<sup>a\*</sup>, Magdalena Dunowska<sup>b\*#</sup>, Erik Hoogendoorn<sup>a\$</sup>, Julia Giles<sup>b</sup>, Dmitry Samborskiy<sup>c</sup>, Alexander E. Gorbalenya<sup>a,c,d#</sup>

<sup>a</sup> Department of Medical Microbiology, Leiden University Medical Center, Leiden, the Netherlands

<sup>b</sup> Institute of Veterinary, Animal and Biomedical Sciences, Massey University, Palmerston North, New Zealand

<sup>c</sup> Belozersky Institute of Physico-Chemical Biology, Lomonosov Moscow State University, Moscow, Russia

<sup>d</sup> Faculty of Bioengineering and Bioinformatics, Lomonosov Moscow State University, Moscow, Russia

\* Joint first authors

\$ Present address: Innovatic, Delft, the Netherlands

# To whom correspondence should be addressed. Dr. Alexander E. Gorbalenya, Tel: +31-71-5261652; Fax: +31-71-5266761; Email: [a.e.gorbalenya@lumc.nl](mailto:a.e.gorbalenya@lumc.nl); Dr. Magdalena Dunowska, Tel: +64 (6) 356 9099 ext 7571; Fax: +64 (6) 350 5714; Email: [M.Dunowska@massey.ac.nz](mailto:M.Dunowska@massey.ac.nz)

## Supplementary tables

**Table S1.** Primer and probe sequences used to sequence the 5'-terminal region of WPDV genome.

| Name             | Sequence (5' to 3')              | Used as | Position (nt) | Round  |
|------------------|----------------------------------|---------|---------------|--------|
| WPD.S5.R         | TGGAGGTGGCGCGTAGGTGT             | primer  | 3,028-3,047   | RACE 1 |
| Biotin-WPD.S5.F  | Biotin-ATGCAGCTTATGTCCTTGATGGGGT | probe   | 2,893-2,917   | RACE 1 |
| WPD.S7.R         | CAGGGCATGTGCGCGGTAGT             | primer  | 2,510-2,530   | RACE 1 |
| WPD.S8.R         | GCCCACGGTTGCTTCAAAAAGTCT         | primer  | 2,062-2,086   | RACE 1 |
| WPD.S10.R        | CCCACTCCAGTGCCTTTGTCAT           | primer  | 1,288-1,309   | RACE 2 |
| WPD.S13.R        | AGGCGCTGCAGTACCGTCGT             | primer  | 1,096-1,115   | RACE 2 |
| WPD.S14.R        | GATGAACGGCATCCCTGACA             | primer  | 1,003-1,022   | RACE 2 |
| Biotin-WPD.S12.F | Biotin-CGGGGCGATCGTGGCTTACAG     | probe   | 887-907       | RACE 2 |
| WPD.S15.R        | CGTCTCCGGGTATCATGGTC             | primer  | 869-888       | RACE 3 |
| WPD.S16.R        | AAAATCGGGTGGACGGATGT             | primer  | 545-564       | RACE 3 |
| WPD.S18.R        | TTGTCGAATCGGGGGTAAGC             | primer  | 150-169       | RACE 3 |

**Table S2.** Protein domains that are conserved in arteriviruses and were used for phylogeny reconstruction.

| Domain <sup>1</sup> | Coordinates in NC_001961.1 genome (nt) <sup>2</sup> |        |
|---------------------|-----------------------------------------------------|--------|
|                     | from                                                | to     |
| nsp3                | 4,927                                               | 5,616  |
| nsp4                | 5,617                                               | 6,228  |
| nsp5                | 6,229                                               | 6,738  |
| nsp7a               | 6,787                                               | 7,233  |
| nsp8-9 <sup>3</sup> | 7,564                                               | 9,617  |
| nsp10_HELcore       | 10,002                                              | 10,775 |
| nsp11               | 10,941                                              | 11,609 |

<sup>1</sup>Domains conserved in all arteriviruses.

<sup>2</sup>Coordinates of conserved domains in NC\_001961.1 genome of PRRSV-2, used to delineate domains in polyprotein MSA of selected arteriviruses (see Figure 3A).

<sup>3</sup>Translation involves -1 PRF.

**Table S3.** Lengths (aa) of arteriviral nsp1-2 protein domains.

| Virus <sup>1</sup> | Domain <sup>2</sup> |       |            |       |       |       |      |     |        |
|--------------------|---------------------|-------|------------|-------|-------|-------|------|-----|--------|
|                    | ZnF                 | PLP1a | 'Nuclease' | PLP1b | PLP1c | Hinge | PLP2 | HVR | TM1-CR |
| PRRSV-2            | 33                  | 147   | 69         | 134   | 0     | 45    | 140  | 650 | 331    |
| PRRSV-1            | 33                  | 147   | 74         | 131   | 0     | 35    | 137  | 557 | 332    |
| LDV                | 33                  | 148   | 65         | 135   | 0     | 0     | 135  | 447 | 324    |
| APRAV              | 36                  | 146   | 66         | 142   | 0     | 11    | 142  | 436 | 340    |
| KRCV-2             | 28                  | 138   | 61         | 124   | 126   | 107   | 134  | 139 | 329    |
| PBJV               | 28                  | 137   | 62         | 124   | 128   | 111   | 139  | 127 | 333    |
| SHFV               | 28                  | 136   | 62         | 124   | 134   | 149   | 136  | 135 | 332    |
| DeMAV              | 28                  | 139   | 62         | 123   | 133   | 100   | 137  | 157 | 331    |
| KRTGV              | 28                  | 138   | 62         | 123   | 133   | 81    | 137  | 155 | 331    |
| KRCV-1             | 28                  | 136   | 62         | 122   | 131   | 124   | 134  | 133 | 329    |
| SHEV               | 28                  | 136   | 61         | 123   | 138   | 140   | 133  | 150 | 326    |
| MYBV-1             | 28                  | 137   | 62         | 124   | 134   | 74    | 135  | 164 | 331    |
| EAV                | 49                  | 90    | 0          | 121   | 0     | 0     | 130  | 125 | 317    |
| WPDV               | 0                   | 98    | 0          | 163   | 142   | 57    | 152  | 143 | 341    |

<sup>1</sup>One virus-representative from each of the fourteen arterivirus species, delineated by DEmARC, was analysed.

<sup>2</sup>Domains were delineated based on similarity with domains and cleavage sites of arteriviruses studied experimentally.

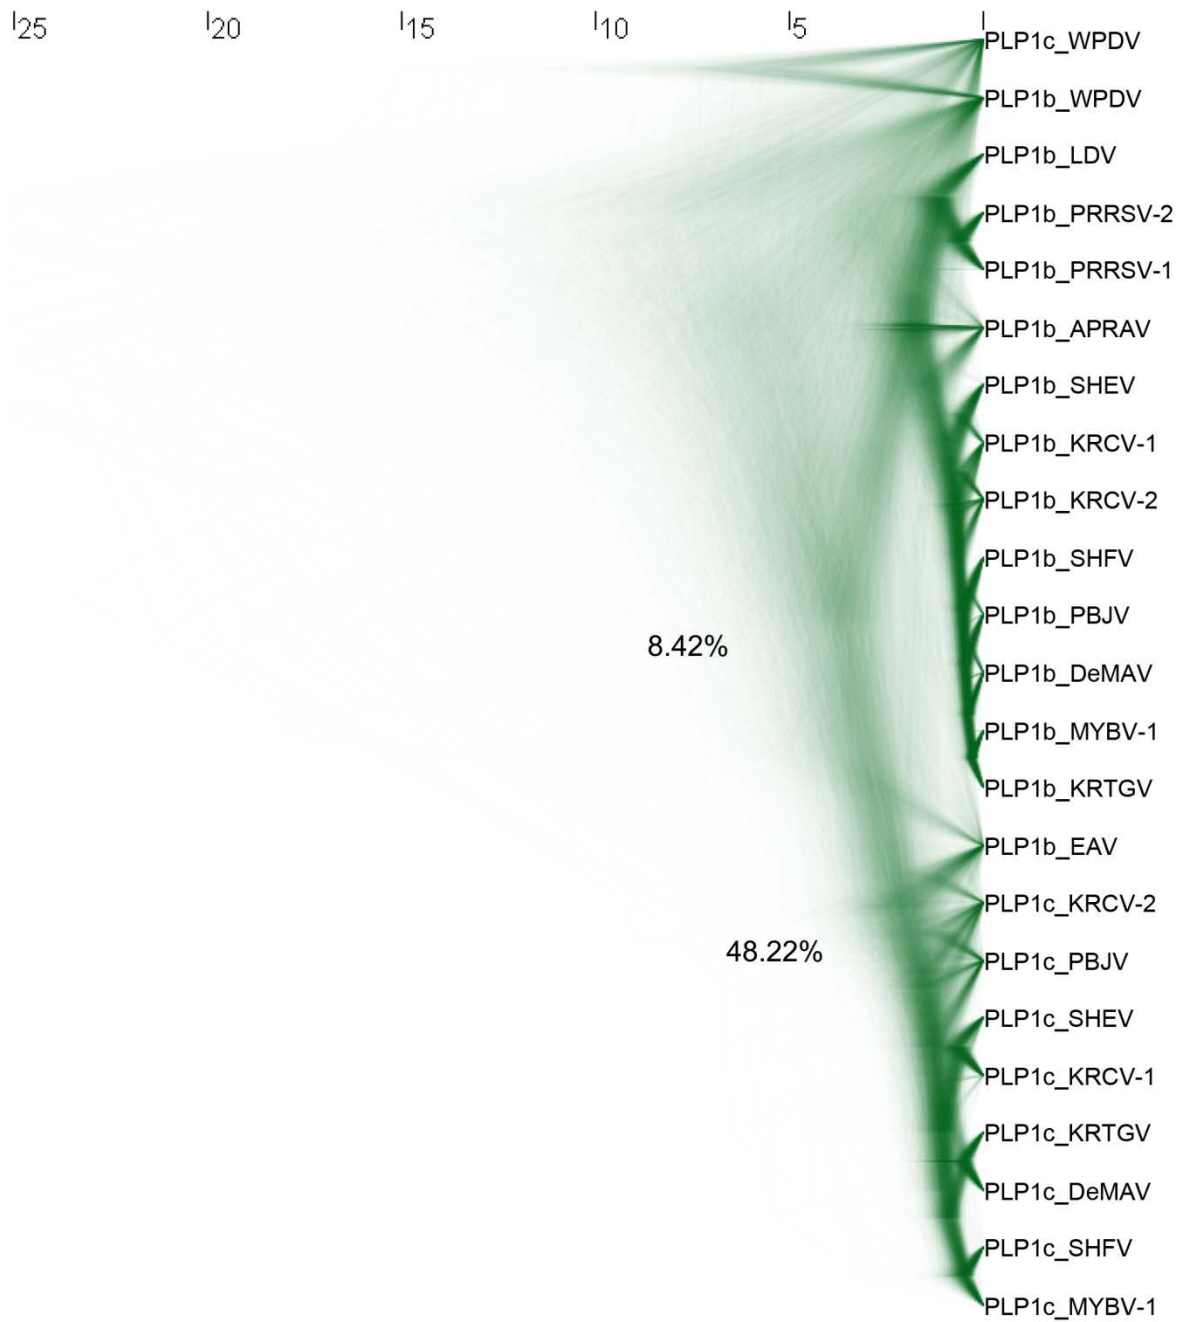

**Figure S1. Phylogeny of PLP1b and PLP1c of arteriviruses.** Shown is a posterior sample of phylogenetic trees generated by BEAST using pan-arterivirus MSA of PLP1b and PLP1c. Percentages of trees in the sample, in which EAV PLP1b is basal to either non-WPDV PLP1c or non-WPDV PLP1bc clades are indicated near the MRCA of the corresponding clades. For other designations, see Figure 3A legend.
